# Supplementary material
Source: publisher site journal article supplement (https://www.dovepress.com/get_supplementary_file.php?f=391807.docx)
Supplement: Supplementary file 1 [file get_supplementary_file.php]

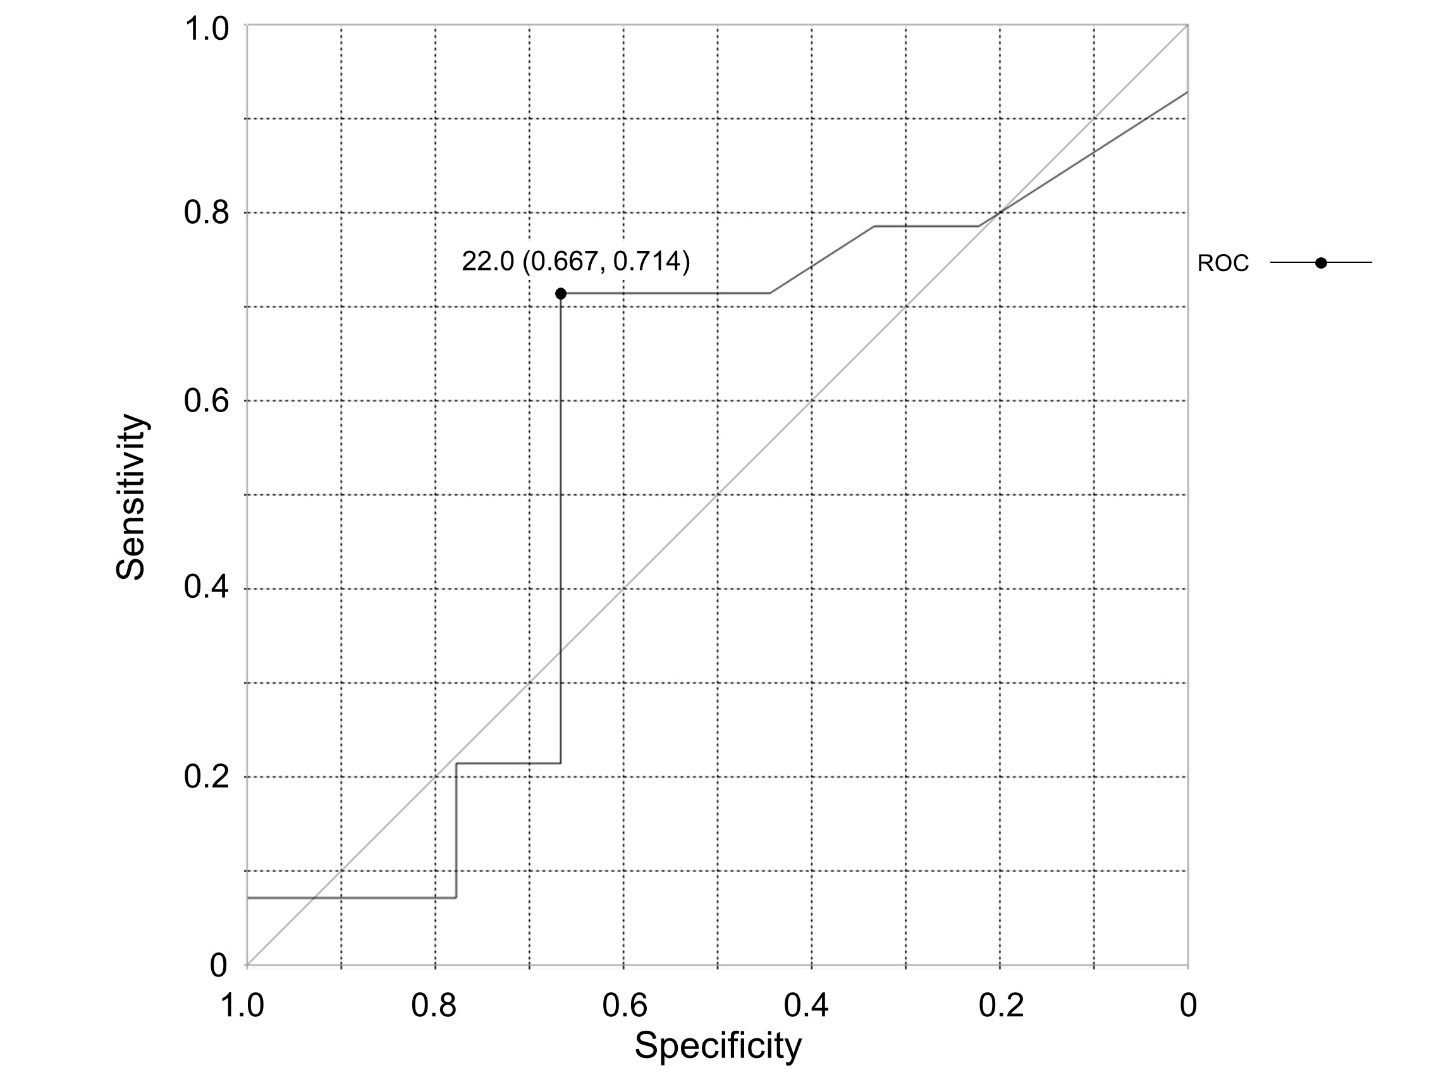


Supplementary Figure 1: ROC curve calculated by blood basophil counts at baseline for achievement of clinical remission

Based on this ROC curve, sensitivity was 71.4% and specificity was 66.7% using blood basophil counts at baseline ≥ 22 (/µl).

Abbreviation: ROC; receiver operating characteristic

| Supplementary Table 1: Achievement rates of clinical remission and four criteria | | | | | |
| --- | --- | --- | --- | --- | --- |
|  | ACT≥20 | no AEx | no OCS use | %FEV1≥80 | CR |
| ALL | 0.78 | 0.70 | 0.74 | 0.61 | 0.22 |
| BEN | 0.77 | 0.62 | 0.77 | 0.62 | 0.15 |
| M-B | 0.80 | 0.80 | 0.70 | 0.60 | 0.30 |
| BMI ≥ 25 (kg/m2) | 0.86 | 0.57 | 1.00 | 0.57 | 0.29 |
| BMI < 25 (kg/m2) | 0.75 | 0.75 | 0.63 | 0.63 | 0.19 |
| MPR ≥ 80% | 0.81 | 0.69 | 0.75 | 0.56 | 0.25 |
| MPR < 80% | 0.83 | 0.83 | 0.83 | 0.67 | 0.17 |
| duration ≥ 20 (years) | 0.80 | 0.67 | 0.80 | 0.60 | 0.20 |
| duration < 20 (years) | 0.75 | 0.75 | 0.63 | 0.63 | 0.25 |
| ECRS(+) | 0.84 | 0.74 | 0.74 | 0.58 | 0.21 |
| ECRS(-) | 0.50 | 0.50 | 0.75 | 0.75 | 0.25 |
| FeNO ≥50 (ppb) | 0.79 | 0.93* | 0.64 | 0.57 | 0.29 |
| FeNO <50 (ppb) | 0.78 | 0.33* | 0.89 | 0.67 | 0.11 |
| BEC ≥300 (/µl) | 0.83 | 0.67 | 0.83 | 0.67 | 0.25 |
| BEC <300 (/µl) | 0.73 | 0.73 | 0.64 | 0.55 | 0.18 |
| BBC ≥22 (/µl) | 0.77 | 0.85 | 0.77 | 0.77 | 0.38† |
| BBC <22 (/µl) | 0.80 | 0.50 | 0.70 | 0.40 | 0.00† |
| These data were shown in Figure 2 as radar charts, and were analyzed using the Fisher's exact test. | | | | | |
| *There was a significant difference in the achievement rate of "no AEx" between FeNO ≥ 50 and < 50 (P=0.0049). | | | | | |
| †There was a significant difference in the achievement rate of "CR" between BBC ≥ 22 and < 22 (P=0.046). | | | | | |
| Abbreviations: ACT; Asthma Control Test, AEx; acute exacerbation, BBC; blood basophil counts, | | | | | |
| BEC; blood eosinophil counts, BEN; benralizumab. BMI; body mass index, CR; clinical remission, | | | | | |
| ECRS; eosinophilic chronic rhinosinusitis, FeNO; fractional exhaled nitric oxide, | | | | | |
| FEV1; forced expiratory volume in one second, M-B; from mepolizumab to benralizumab treatment, | | | | | |
| MPR; medication possession ratio, OCS; oral corticosteroid | | | | | |
